# Supplementary material for: Simple fabrication of a highly conductive and passivated PEDOT:PSS film via cryo-controlled quasi-congealing spin-coating for flexible perovskite solar cells
Source: Royal Society of Chemistry journal article supplement (doi:10.1039/c9tc02744k), 2019-01-01
Supplement: c9tc02744k1.pdf [file c9tc02744k1.pdf]

# **Simple fabrication of highly conductive and passivated PEDOT:PSS film via cryo-controlled quasi-congealing spin- coating for flexible perovskite solar cells**

Wei-Hsiang Chen<sup>a,b</sup>, Linlin Qiu<sup>b</sup>, Pengyun Zhang<sup>b</sup>, Pei-Cheng Jiang<sup>c</sup>, Pingfan Du<sup>a,b</sup>,

Lixin Song<sup>a,b\*</sup>, Jie Xiong<sup>a,b\*</sup>, Frank Ko<sup>d</sup>

*<sup>a</sup>Key Laboratory of Advanced Textile Materials and Manufacturing Technology,*

*Ministry of Education, Hangzhou 310018, PR China*

*<sup>b</sup>Silk Institute, College of Materials and Textiles, Zhejiang Sci-Tech University,*

*Hangzhou 310018, PR China*

*<sup>c</sup>Institute of Physics, Academia Sinica, Taipei 11529, Taiwan*

*<sup>d</sup>Department of Materials Engineering, University of British Columbia, Vancouver,*

*Canada*

\*Corresponding authors. Tel.: +86 571 86843586; fax: +86 571 86843603.

*E-mail addresses:* lxsong12@zstu.edu.cn (L. Song); jxiong@zstu.edu.cn (J. Xiong).

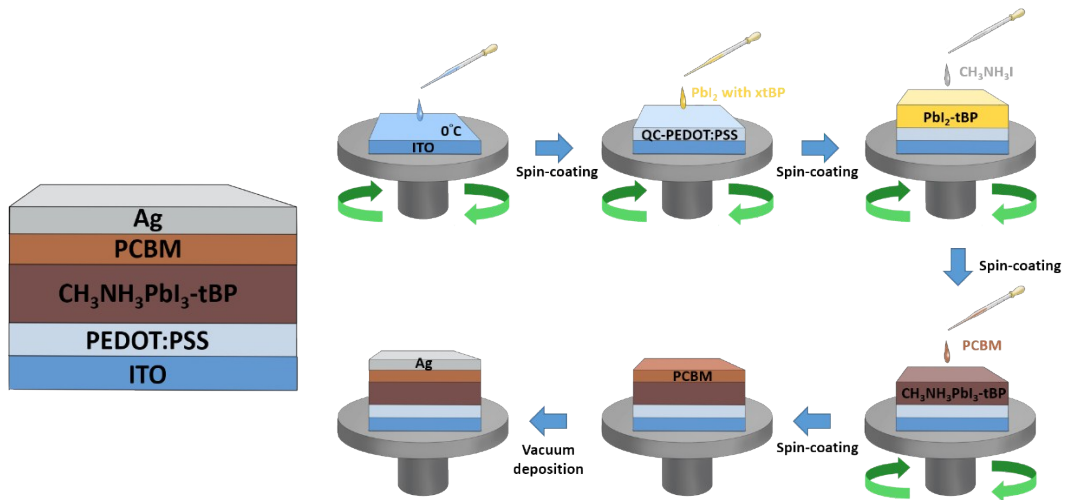

**Figure S1.** The model of inverted-planar PSC and the experimental process for fabricating.

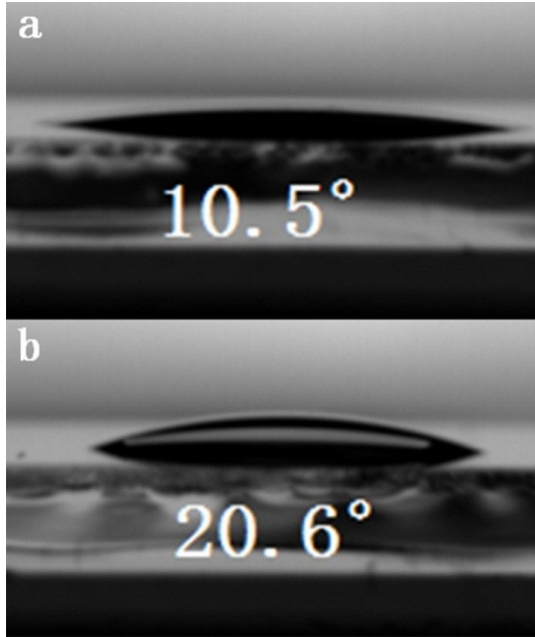

**Figure S2.** Water-contact-angle measurements were taken of water droplets on the films of (a) C-PEDOT:PSS and (b) QC-PEDOT:PSS.

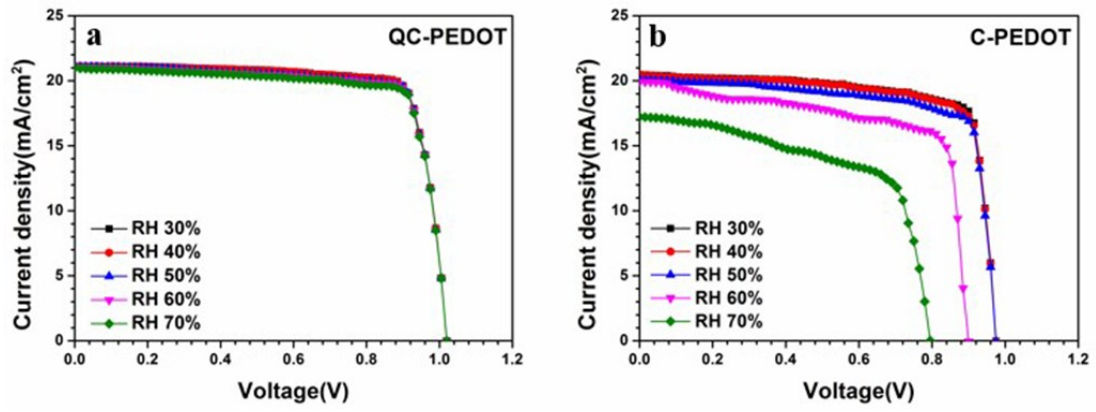

**Figure S3.**  $J$ - $V$  curves of PSCs with (a) QC-PEDOT:PSS, (b) C-PEDOT:PSS fabricated at different moisture condition.

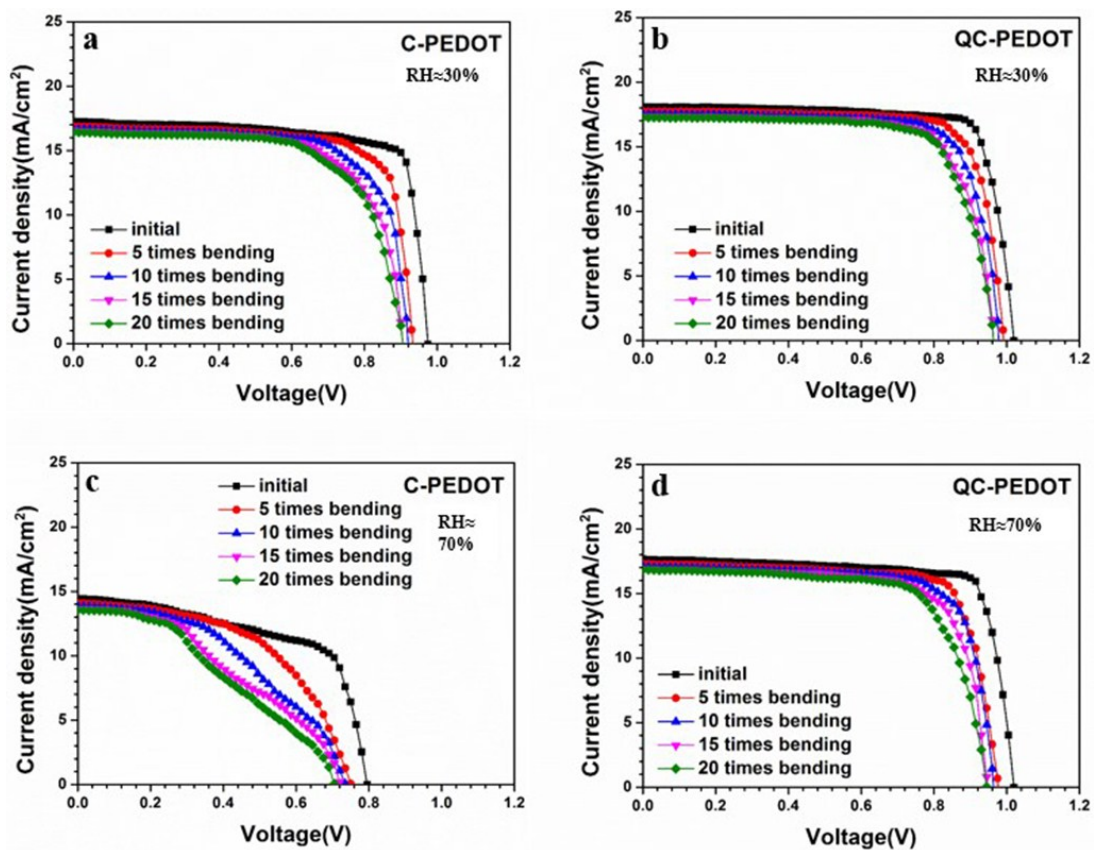

**Figure S4.**  $J$ - $V$  curves of different fabricated flexible PSCs (a) C-PEDOT:PSS-RH30, (b) QC-PEDOT:PSS-RH30, (c) C-PEDOT:PSS-RH70, (d) QC-PEDOT:PSS-RH70 with different times of bending.

**Table S1.** Detailed photovoltaic parameters for QC-PEDOT:PSS-based PSCs fabricated at different moisture condition.

| QC-PEDOT         | $J$ (mA/cm <sup>2</sup> ) | $V$ (V) | FF (%) | PCE (%) |
|------------------|---------------------------|---------|--------|---------|
| RH $\approx$ 30% | 21.13                     | 1.02    | 82     | 17.67   |
| RH $\approx$ 40% | 21.11                     | 1.02    | 82     | 17.65   |
| RH $\approx$ 50% | 21.09                     | 1.02    | 82     | 17.61   |
| RH $\approx$ 60% | 21.05                     | 1.02    | 82     | 17.51   |
| RH $\approx$ 70% | 20.99                     | 1.01    | 82     | 17.34   |

**Table S2.** Detailed photovoltaic parameters for C-PEDOT:PSS-based PSCs fabricated at different moisture condition.

| C-PEDOT          | $J$ (mA/cm <sup>2</sup> ) | $V$ (V) | FF (%) | PCE (%) |
|------------------|---------------------------|---------|--------|---------|
| RH $\approx$ 30% | 20.47                     | 0.97    | 80     | 15.90   |
| RH $\approx$ 40% | 20.44                     | 0.97    | 79     | 15.60   |
| RH $\approx$ 50% | 20.10                     | 0.97    | 78     | 15.24   |
| RH $\approx$ 60% | 19.93                     | 0.90    | 72     | 12.89   |
| RH $\approx$ 70% | 17.23                     | 0.79    | 62     | 8.44    |

**Table S3.** Detailed photovoltaic parameters for flexible C-PEDOT:PSS-RH30-based PSCs with different times of bending.

| C-PEDOT-RH30     | $J$ (mA/cm <sup>2</sup> ) | $V$ (V) | FF (%) | PCE (%) |
|------------------|---------------------------|---------|--------|---------|
| Initial          | 17.27                     | 0.98    | 79     | 13.37   |
| 5 times bending  | 16.90                     | 0.94    | 74     | 11.77   |
| 10 times bending | 16.68                     | 0.92    | 71     | 10.83   |
| 15 times bending | 16.54                     | 0.91    | 68     | 10.16   |
| 20 times bending | 16.42                     | 0.90    | 66     | 9.76    |

**Table S4.** Detailed photovoltaic parameters for flexible QC-PEDOT:PSS-RH30-based

PSCs with different times of bending.

| QC-PEDOT-RH30    | J (mA/cm <sup>2</sup> ) | V (V) | FF (%) | PCE (%) |
|------------------|-------------------------|-------|--------|---------|
| Initial          | 18.09                   | 1.02  | 82     | 15.13   |
| 5 times bending  | 17.75                   | 0.99  | 79     | 13.92   |
| 10 times bending | 17.52                   | 0.98  | 77     | 13.16   |
| 15 times bending | 17.35                   | 0.97  | 76     | 12.71   |
| 20 times bending | 17.26                   | 0.97  | 74     | 12.41   |

**Table S5.** Detailed photovoltaic parameters for flexible C-PEDOT:PSS-RH70-based

PSCs with different times of bending.

| C-PEDOT-RH70     | J (mA/cm <sup>2</sup> ) | V (V) | FF (%) | PCE (%) |
|------------------|-------------------------|-------|--------|---------|
| Initial          | 14.44                   | 0.80  | 61     | 7.08    |
| 5 times bending  | 14.08                   | 0.75  | 53     | 5.59    |
| 10 times bending | 13.84                   | 0.74  | 41     | 4.46    |
| 15 times bending | 13.66                   | 0.72  | 37     | 3.61    |
| 20 times bending | 13.55                   | 0.71  | 35     | 3.33    |

**Table S6.** Detailed photovoltaic parameters for flexible QC-PEDOT:PSS-RH70-based

PSCs with different times of bending.

| QC-PEDOT-RH70    | J (mA/cm <sup>2</sup> ) | V (V) | FF (%) | PCE (%) |
|------------------|-------------------------|-------|--------|---------|
| Initial          | 17.66                   | 1.02  | 81     | 14.59   |
| 5 times bending  | 17.32                   | 0.98  | 77     | 13.13   |
| 10 times bending | 17.09                   | 0.97  | 74     | 12.26   |
| 15 times bending | 16.91                   | 0.95  | 72     | 11.67   |
| 20 times bending | 16.85                   | 0.95  | 71     | 11.38   |
